# Supplementary material
Source: HighWire-hosted journal article supplement (https://jnm.snmjournals.org/highwire/filestream/94297/field_highwire_adjunct_files/0/95224_Supplemental_Data.pdf)
Supplement: 95224_Supplemental_Data.pdf [file 95224_Supplemental_Data.pdf]

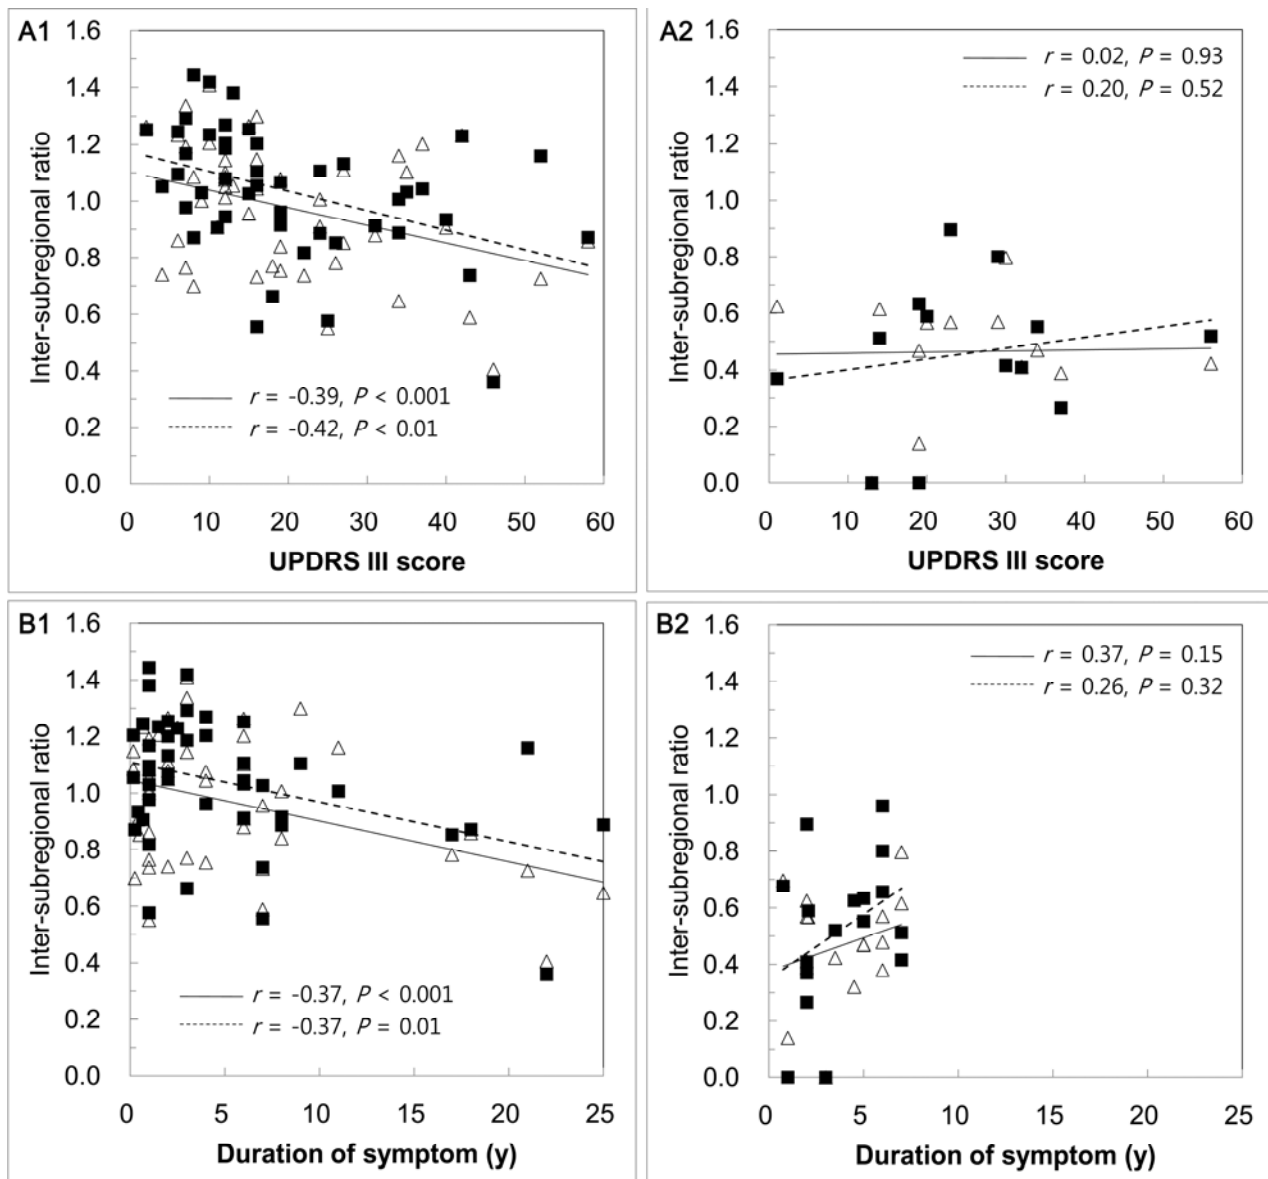

**Supplemental FIGURE 1.** Changes in the intersubregional ratios of  $BP_{ND}$ , AC/VS, in PD (A1, B1) and PSP groups (A2, B2) according to clinical severity indices (■ = less affected side, △ = more affected side).

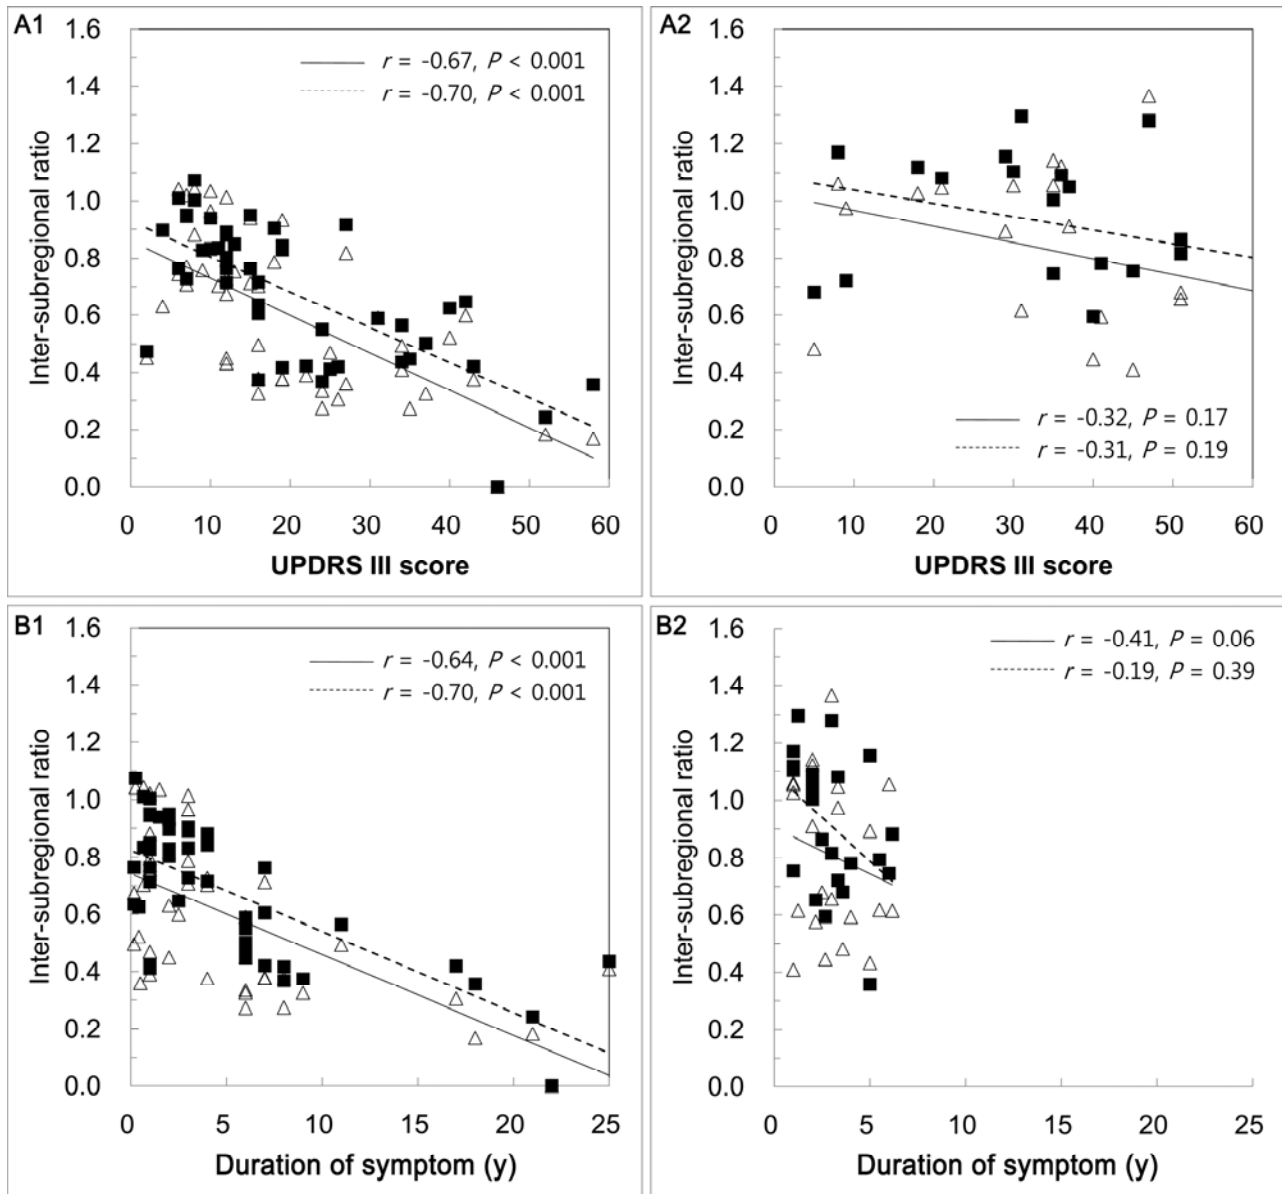

**Supplemental FIGURE 2.** Changes in the intersubregional ratios of  $BP_{ND}$ , PP/VP, in PD (A1, B1) and MSA groups (A2, B2) according to clinical severity indices (■ = more affected side, △ = less affected side).
